# Supplementary material for: Exploring the Potential of siRNA Delivery in Acute Myeloid Leukemia for Therapeutic Silencing
Source: MDPI journal article supplement (doi:10.3390/nano13243167), 2023-12-18
Supplement: s1 [file s1]

## Exploring the Potential of siRNA Delivery in Acute Myeloid Leukemia for Therapeutic Silencing

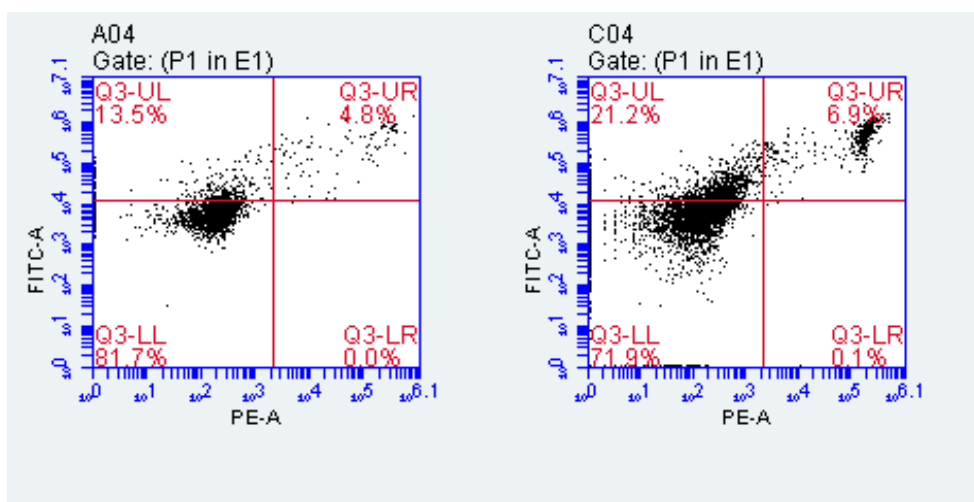

**Figure S1:** Flow cytometry histograms for non-treated (NT) cells and cells treated with surviving siRNA.
